# Supplementary material for: Highly crystalline mesoporous SSZ-13 zeolite obtained via controlled post-synthetic treatment
Source: Royal Society of Chemistry journal article supplement (doi:10.1039/c8ra08979e), 2018-12-20
Supplement: c8ra08979e1.pdf [file c8ra08979e1.pdf]

## Highly crystalline mesoporous SSZ-13 zeolite obtained via controlled post-synthetic treatment

Maryani K. Wardani,<sup>a</sup> Grandprix. T. M. Kadja,<sup>a\*</sup> Adroit T. N. Fajar,<sup>a</sup> Subagjo,<sup>b</sup> I.G.B.N Makertiharta,<sup>b</sup> Melia L. Gunawan,<sup>b</sup> Veinardi Suendo<sup>a,c</sup> and Rino R. Mukti<sup>a,c</sup>

---

<sup>a</sup> *Division of Inorganic and Physical Chemistry, Institut Teknologi Bandung, Jl. Ganesha no. 10, Bandung, 40132, Indonesia.*

<sup>b</sup> *Department of Chemical Engineering, Institut Teknologi Bandung, Jl. Ganesha no. 10, Bandung, 40132, Indonesia.*

<sup>c</sup> *Research Center for Nanosciences and Nanotechnology, Institut Teknologi Bandung, Jl. Ganesha no. 10, Bandung, 40132, Indonesia.*

### Corresponding Author

\*(G.T.M.K) E-mail: kadja@chem.itb.ac.id

Tel: +62-22-250-2103; Fax: +62-22-250-4154

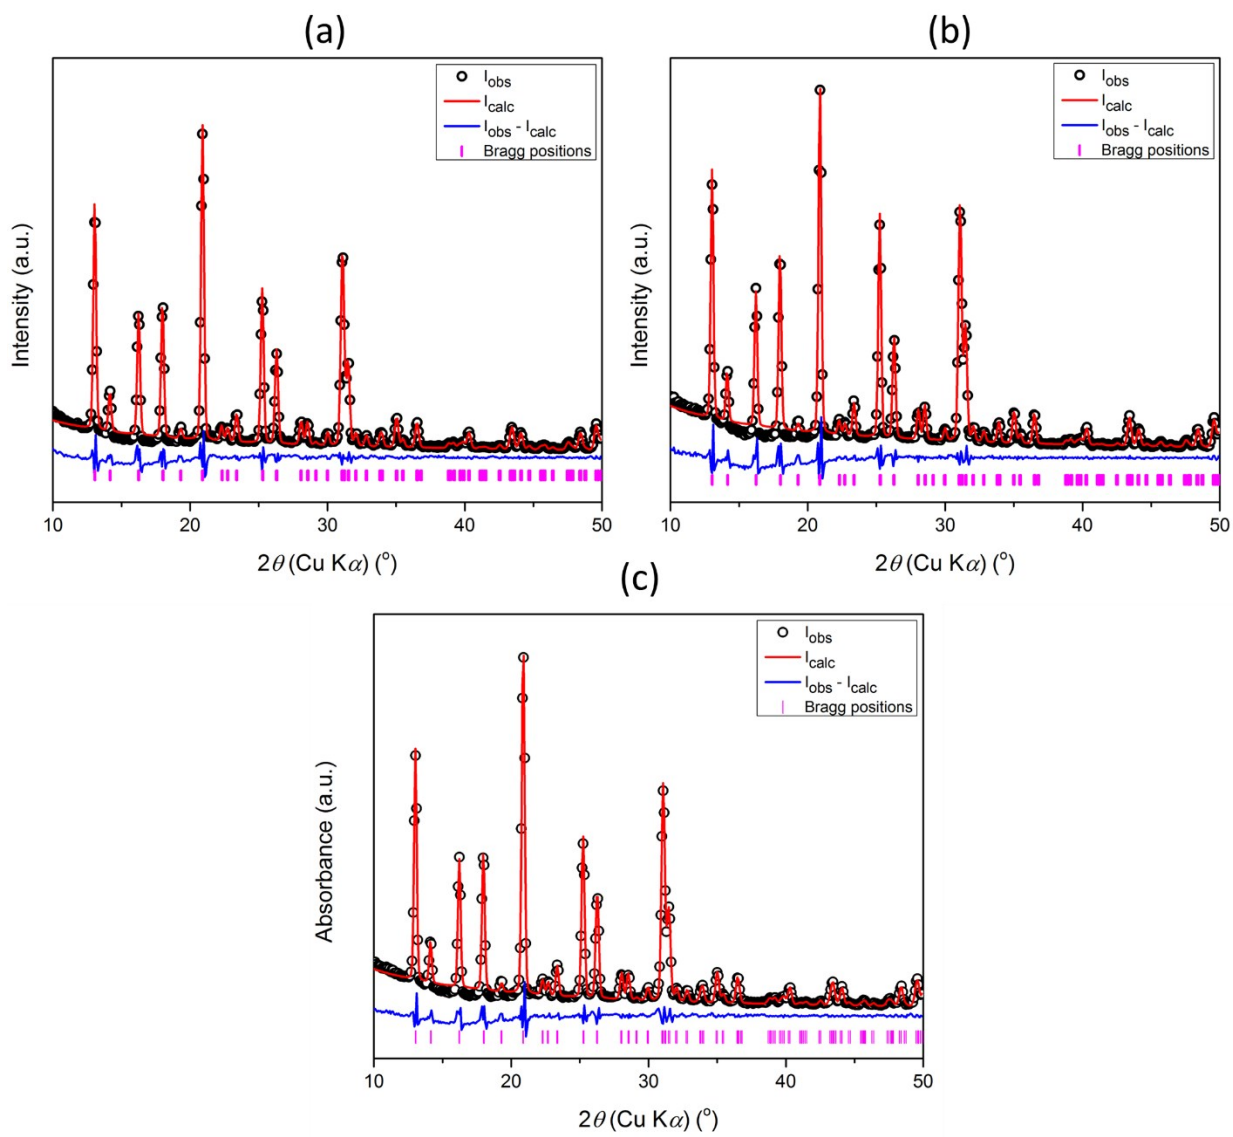

**Figure S1.** Whole XRD pattern fitting of (a) C550, (b) AS-AT and (c) C250-AT.

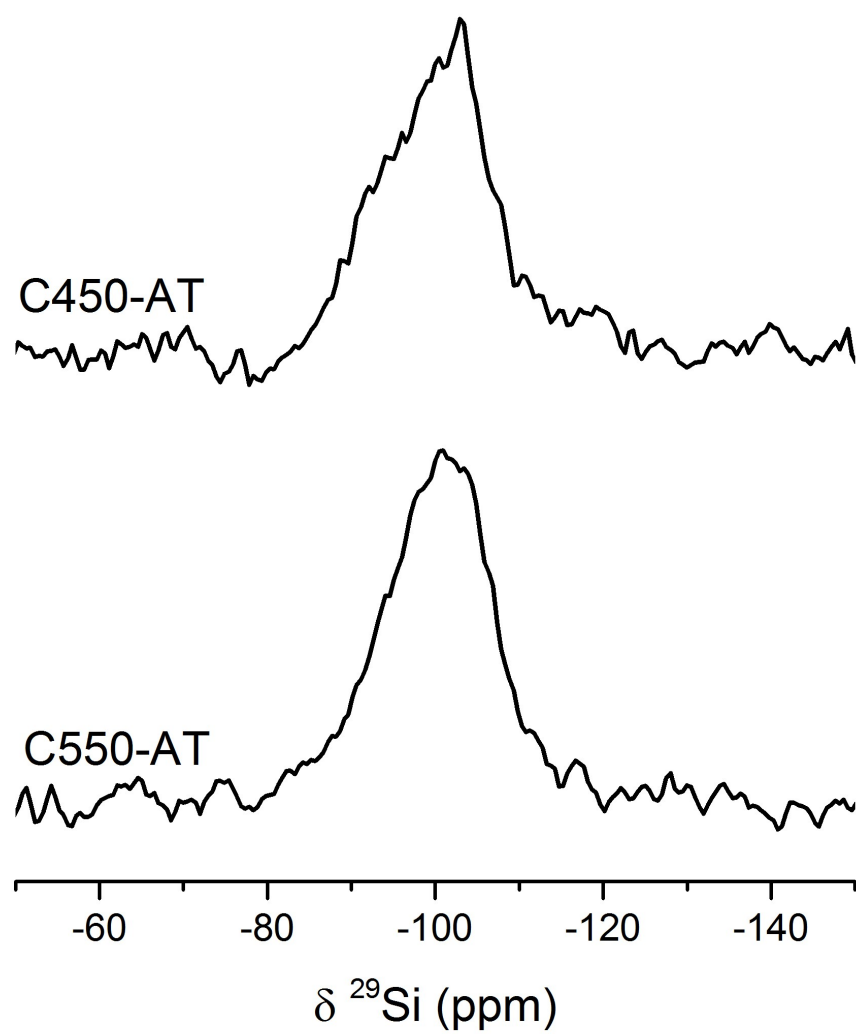

**Figure S2.**  $^{29}\text{Si}$  MAS NMR spectra of C450-AT and C550-AT.

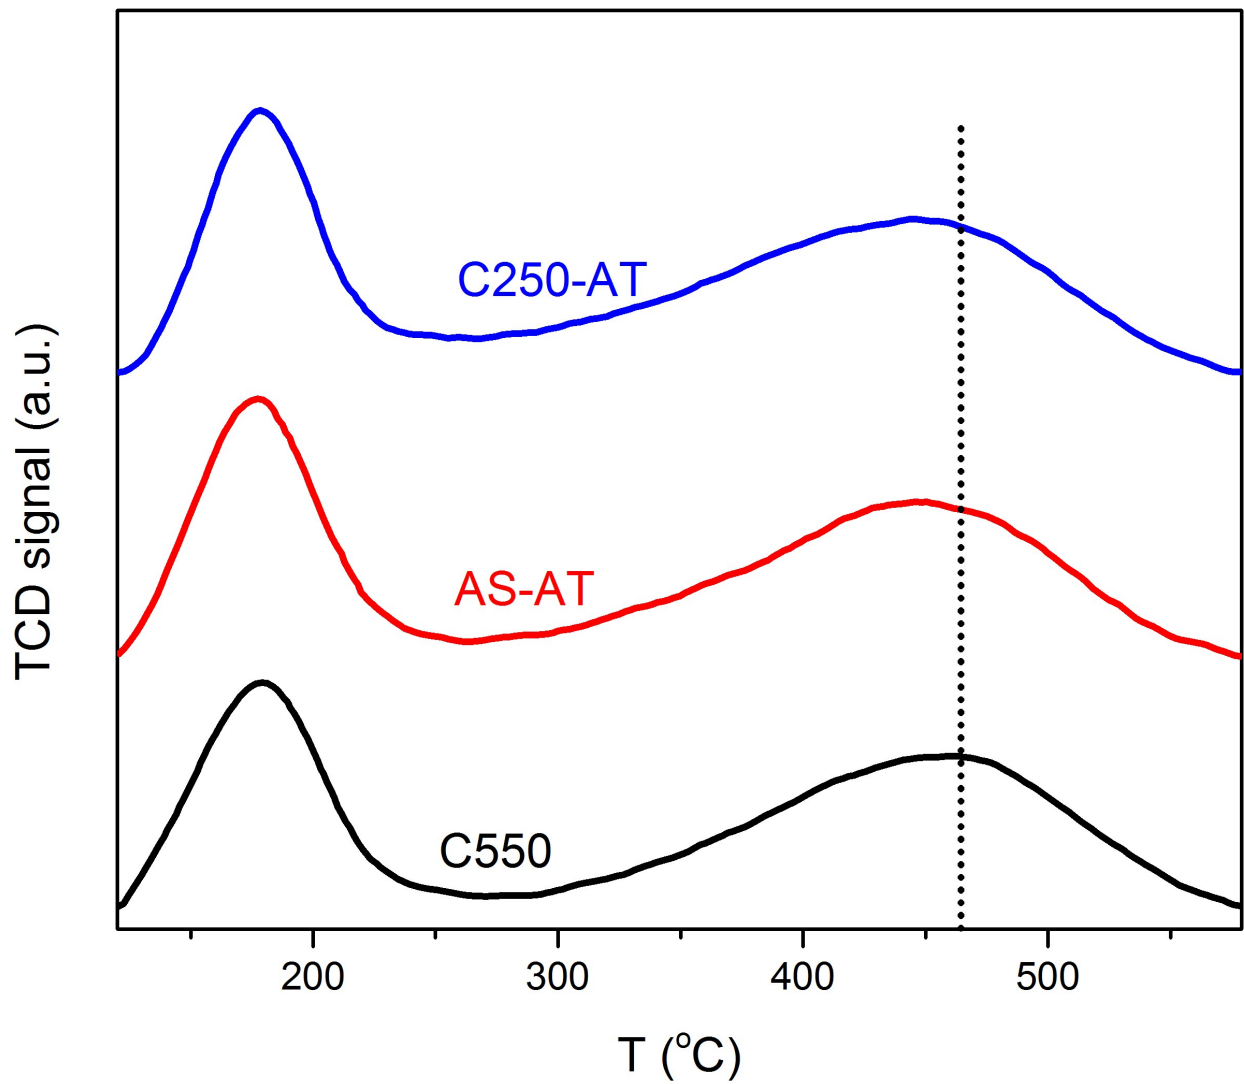

Figure S3. NH<sub>3</sub>-TPD profiles of C550, AS-AT and C250-AT.

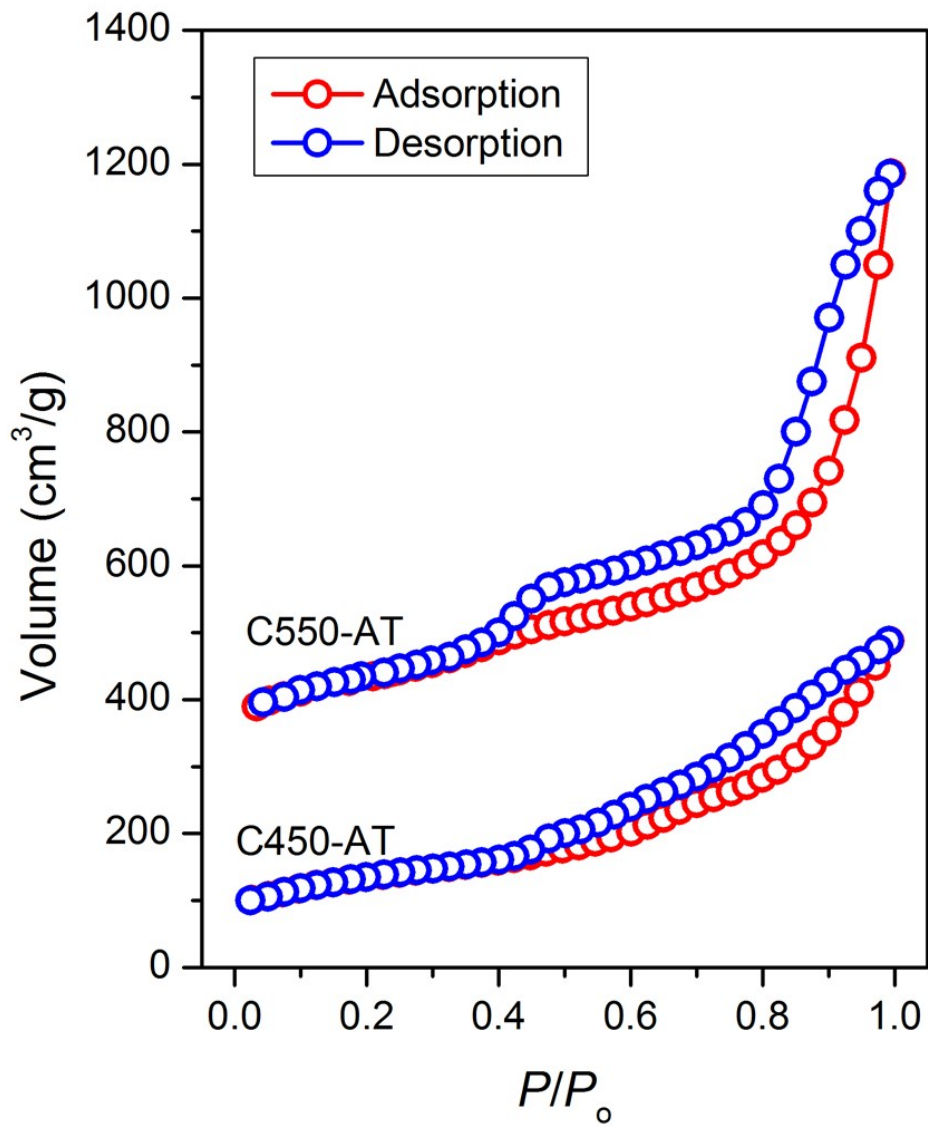

**Figure S4.** N<sub>2</sub> adsorption-desorption isotherms of C450-AT and C550-AT.

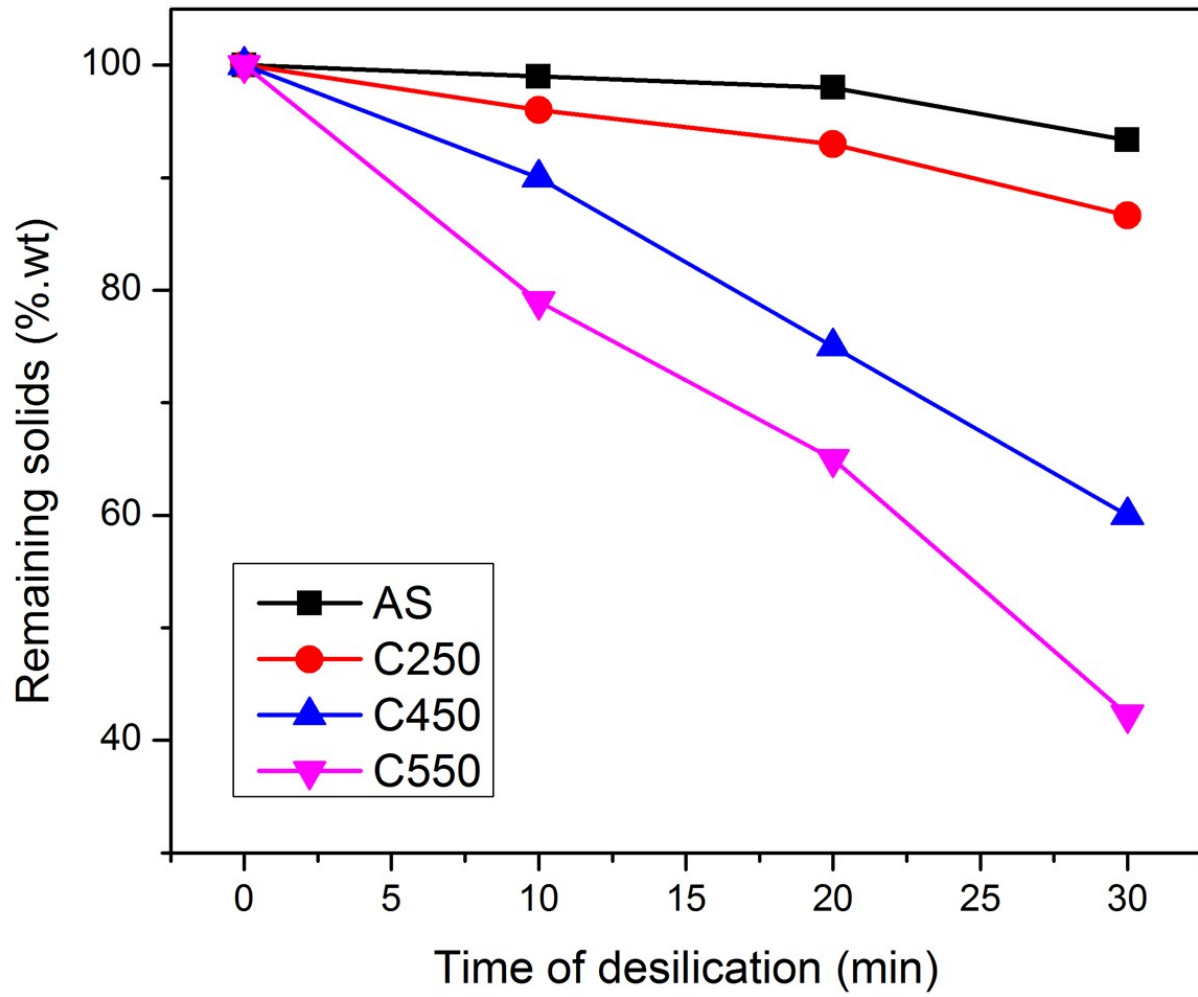

Figure S5. Plots of remaining solids versus time of desilication for AS, C250, C450 and C550.

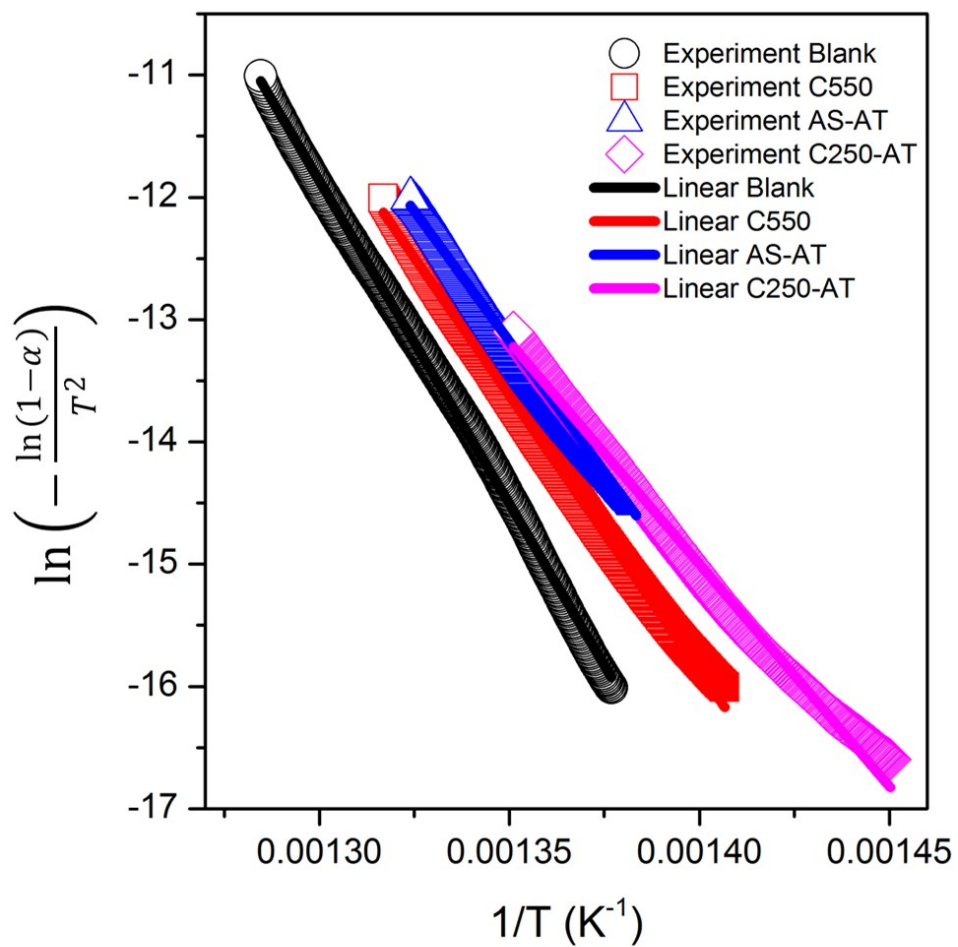

**Figure S6.** Coats-Redfern plots of LDPE pyrolysis with and without the presence of catalysts.
